# Supplementary material for: Wheat germ agglutinin modification of lipid–polymer hybrid nanoparticles: enhanced cellular uptake and bioadhesion
Source: Royal Society of Chemistry journal article supplement (doi:10.1039/c6ra04023c), 2016-01-01

Supplemented Figure 1. Haemagglutination test of LPNs (A) and PBS (B) in a red blood cell suspension, observed by optical microscopy.

Supplemented Figure 1.

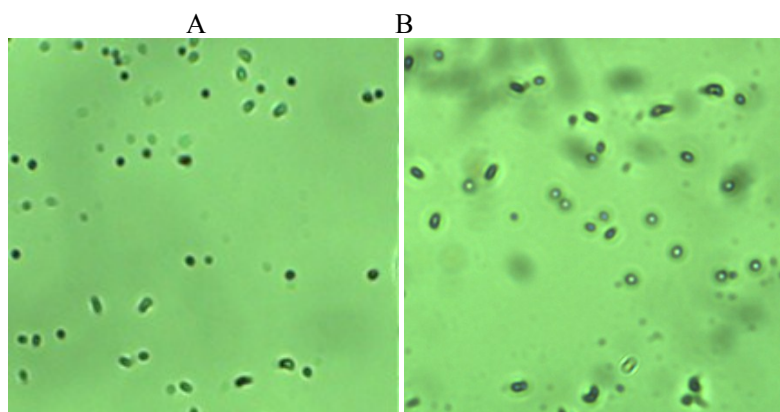

Supplement: c6ra04023c1.pdf [file c6ra04023c1.pdf]
